# Supplementary material for: Dendritic mitoflash as a putative signal for stabilizing long-term synaptic plasticity
Source: PubMed Central journal article supplement (PMC5484698; doi:10.1038/s41467-017-00043-3), 2017-06-26
Supplement: 41467_2017_43_MOESM2_ESM.pdf [file 41467_2017_43_MOESM2_ESM.pdf]

File Name: Supplementary Information

Description: Supplementary Figures and Supplementary Table

File Name: Supplementary Movie 1

Description: **Dendritic mitoflashes in a primary hippocampal neuron.** Dendritic mitochondria (green) and spines (red) are imaged in a DIV 18 neuron co-expressing mt-cpYFP and actin-mCherry. The movie contains 94 time points at 7.83s intervals. For each time point, the red channel is the maximal intensity projection of a z-stack of 6 mCherry images at 1- $\mu$ m axial interval, whereas the green channel displays single mt-cpYFP image at a pre-selected focal plane. Arrowheads are added to indicate the onset of subsequent mitoflashes. Time-courses of these mitoflashes are simultaneously plotted on the right.

## Supplementary Figures

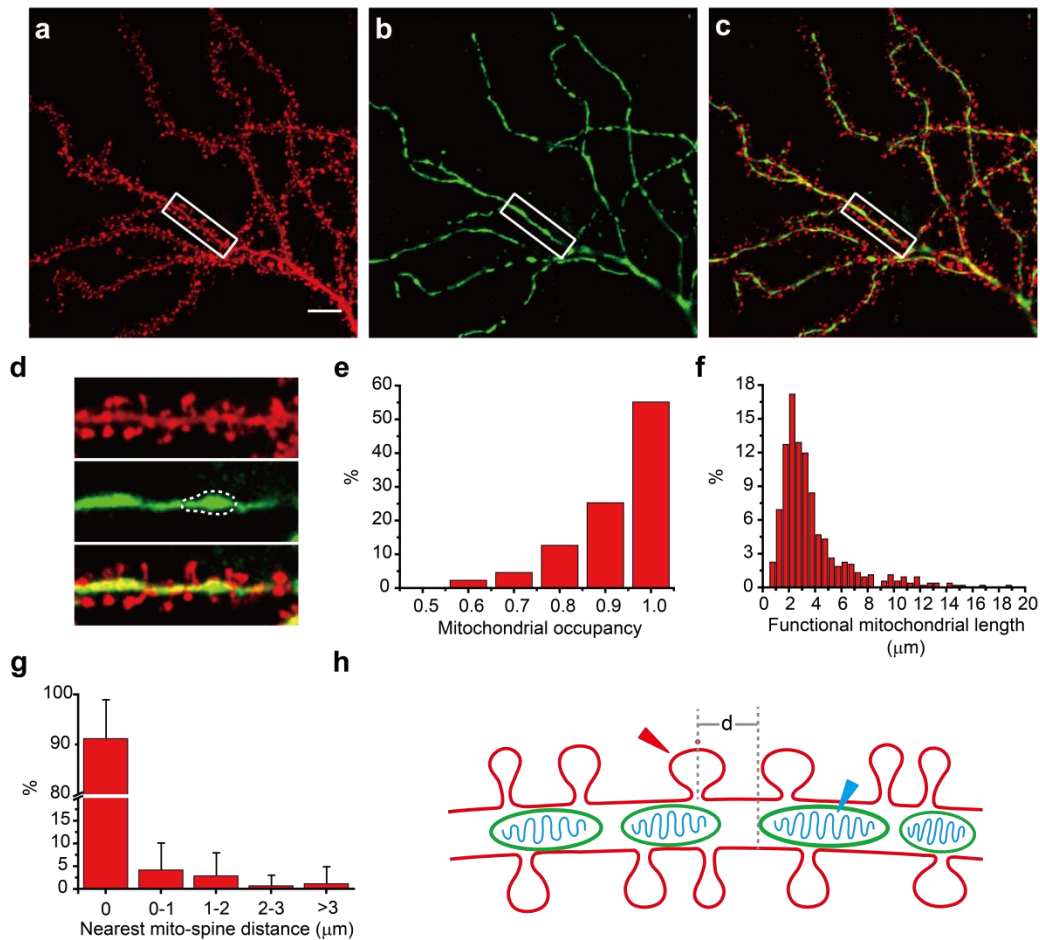

### Supplementary Figure 1 Distribution of mitochondria in dendrites.

(a-c) Fluorescence images of dendrites (a) and dendritic mitochondria (b) visualized by actin-mCherry (a) and mt-cpYFP (b). Scale bar, 10  $\mu\text{m}$ . (c) The merged image of (a) and (b). (d) Enlarged views of the boxed regions in (a-c). Dashed line outlines the boundary of a functional mitochondrion based on the spatial extent of a mitoflash. (e) Distribution of mitochondrial occupancy in dendrites. *Mitochondrial occupancy* =  $\frac{\text{dendritic mitochondrial length}}{\text{dendritic segment length}}$ . The dendrite between two adjacent branch points was considered to be a dendritic segment. n = 151 segments from 17 neurons. (f) Distribution of dendritic mitoflash length. n = 573 mitoflashes, the spatial extent of which reflect the length of functional mitochondria. (g) Distribution of the distance between a spine and its nearest mitochondrion in the parent dendrite (mean  $\pm$  s.e.m.). Data are from 20 neurons. (h) Diagram defining the distance between target spine and stimulated mitochondrion. "d" is the distance between target spine neck and nearest edge of stimulated mitochondrion.

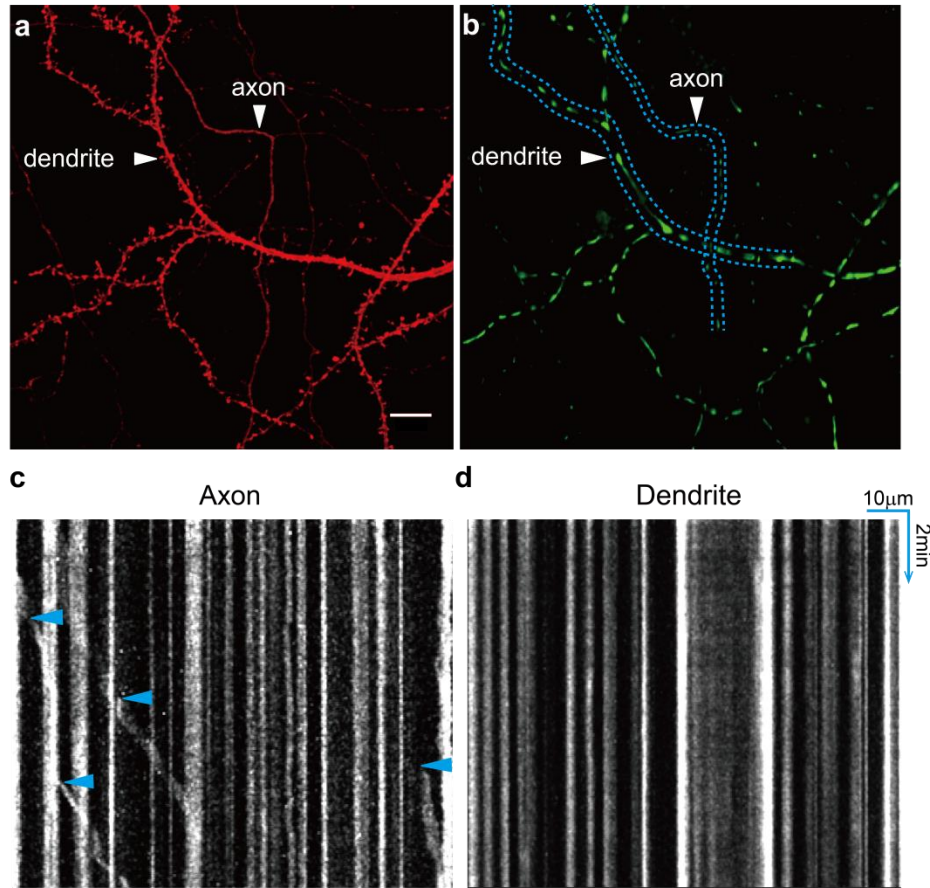

**Supplementary Figure 2 Mitochondria are stationary in dendrites but mobile in axons.**

(a) Dendrites and an axon visualized by actin-mCherry, Scale bar, 10  $\mu\text{m}$ . (b) Mitochondria in the dendrites and axon visualized by mt-cpYFP. Dashed lines mark a 100- $\mu\text{m}$  dendrite and a 100- $\mu\text{m}$  axon. Note that axonal mitochondria are generally smaller and dimmer than those in dendrites. (c, d) Kymographs showing mitochondrial movement in an axon (c) and a dendrite (d) within 10 min. Blue triangles point to moving mitochondria.

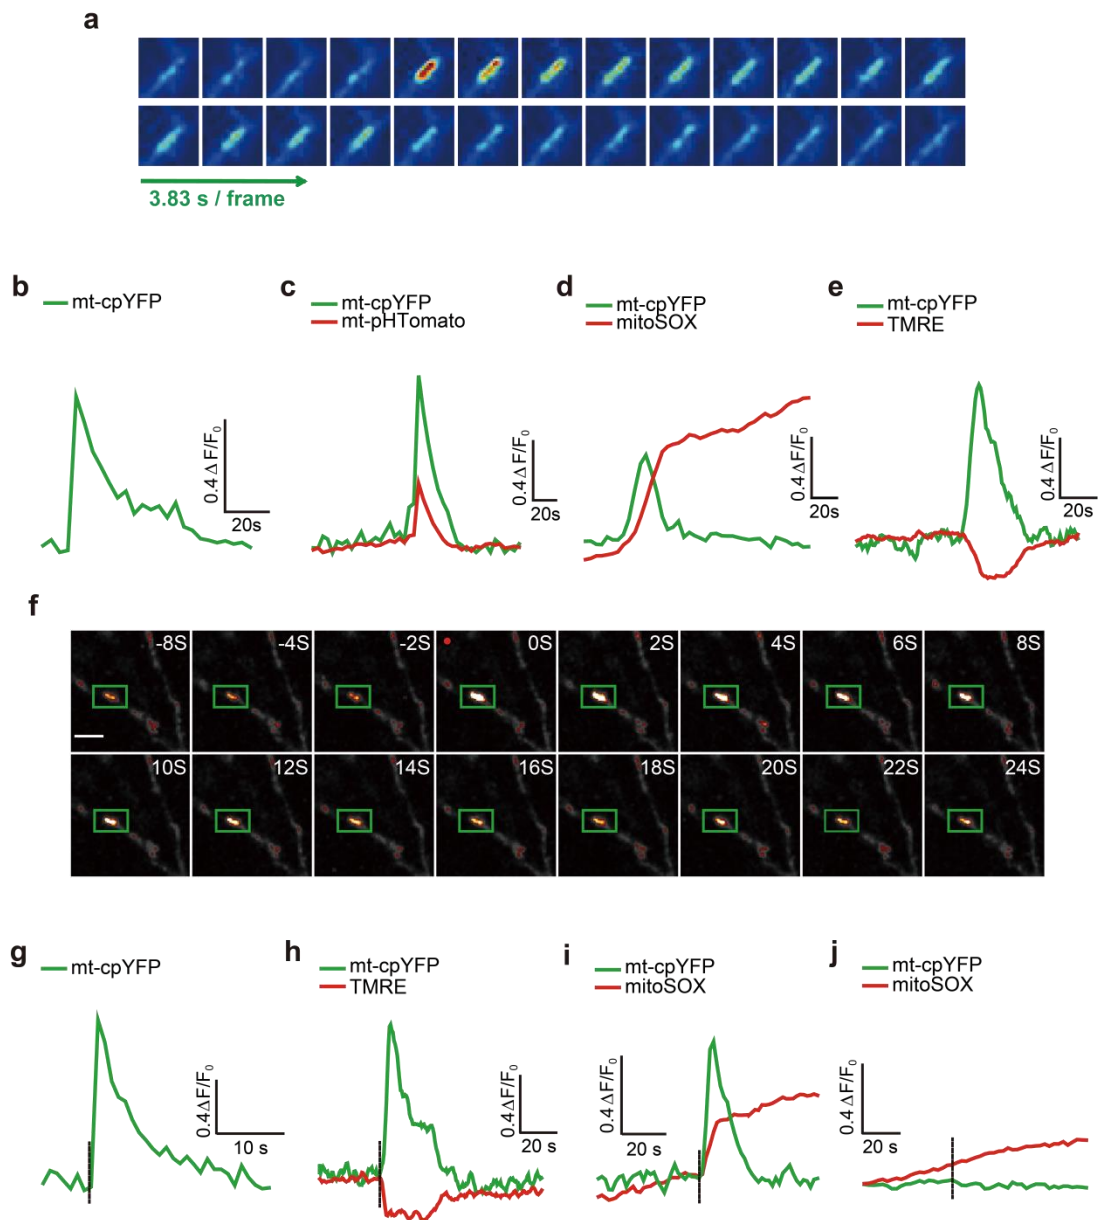

### Supplementary Figure 3 Properties of spontaneous and PA-induced mitoflashes in hippocampal neurons.

(a-e) Properties of spontaneous mitoflashes in hippocampal neurons. (a) Time-lapse images of a dendritic mitoflash reported by mt-cpYFP and displayed at 3.83 s intervals. Horizontal side length = 5.4  $\mu$ m. (b) Time course of the mitoflash in (a). (c) Mitoflash activity is accompanied by pH alkalization reported by mt-pHTomato, a mitochondrion-located pH-sensitive fluorescent protein. (d) The rising phase of the mitoflash is coupled with a step-increase of the mitoSOX signal. (e) Mitoflash is coupled with transient mitochondrial depolarization reported as a decreasing tetramethylrhodamine, ethyl ester (TMRE) signal. In all panels, similar results were obtained in at least 20 experiments. (f-j) Properties of PA-mitoflashes in hippocampal

neurons. **(f)** Time-lapse images of a PA-mitoflash. Green box: target mitochondrion for photoactivation. Red dot denotes the time point for photoactivation. Scale bar, 5  $\mu\text{m}$ . **(g)** Time course of the PA-mitoflash in **(f)**. Vertical dashed line: time of laser stimulation (720 nm at 10 mW for 1 ms). **(h)** PA-mitoflash is coupled with transient depolarization of the mitochondrial membrane potential as measured with TMRE. **(i)** PA-mitoflash is coupled with a stepwise increase of the mitoSOX signal. **(j)** Laser stimulation *per se* does not increase mitoSOX signal when it fails to elicit a PA-mitoflash. Vertical dashed line marks laser stimulation. See also (Supplementary Fig. 7).

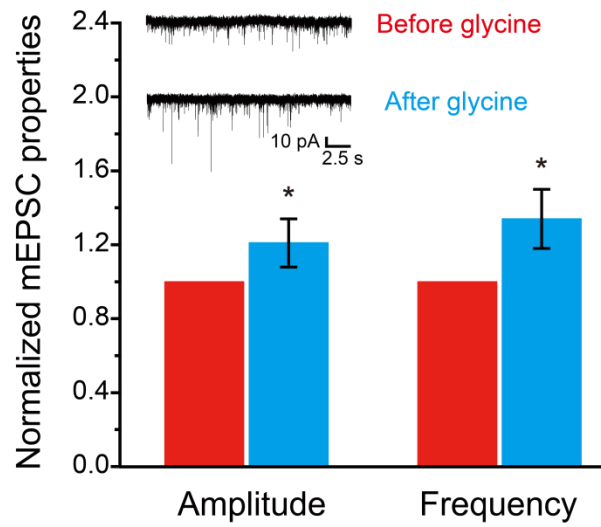

**Supplementary Figure 4 Chemical LTP induced by glycine stimulation.**

Bars show statistical analysis of changes in mEPSC amplitude and frequency. Insets are examples of electrophysiological recordings before and after 5 min stimulation with 100  $\mu$ M glycine. Detailed experimental conditions are described in Methods.  $n = 9$  neurons for 5 batches (results are presented as mean  $\pm$  s.d.). \* $p < 0.05$ ; paired t-test vs baseline.

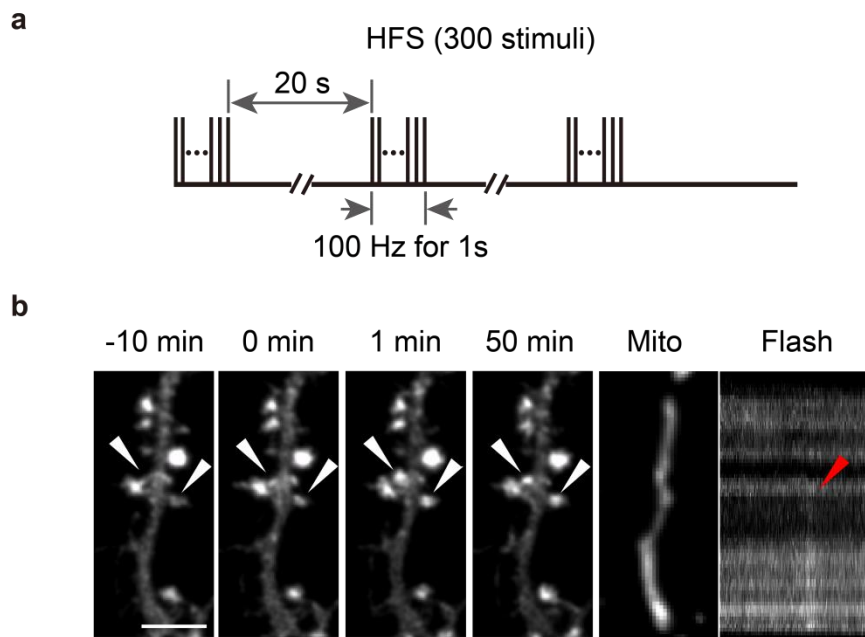

**Supplementary Figure 5 Structural LTP induction by high frequency field stimulation.**

(a) High frequency field stimulation (HFS) paradigm for induction of sLTP. 3 X 100 pulses at 100Hz, 20s apart. (b) Dendritic segment and mitochondria (Mito) were visualized by actin-mCherry and mt-cpYFP, respectively. Time-lapse images showing spine morphological changes following HFS. Rightmost kymograph was reconstructed along a line on the mitochondrion and corresponds to the period of 10-20min after HFS. White and red arrowheads mark, respectively, spines undergoing sLTP and a mitoflash occurring beneath them. Scale bar, 5  $\mu$ m.

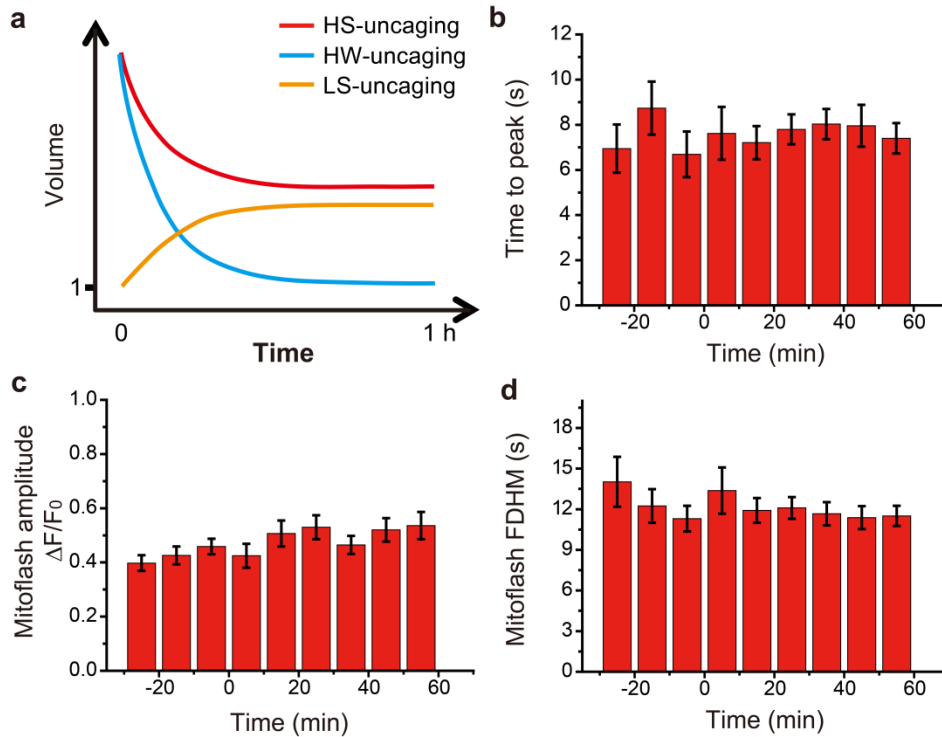

**Supplementary Figure 6 Single-spine targeted glutamate uncaging induces CaMKII-dependent sLTP and phasic activation of mitoflashes.**

**(a)** Schematic of the different glutamate-uncaging paradigms. Red, high-concentration strong glutamate-uncaging (HS-uncaging, 6 mM NMI-glutamate, 720 nm laser at 10 mW, 120 pulses, 2 Hz) induced both short-term (<30 min) and long-term spine enlargement. Blue, high-concentration weak stimulation (HW-uncaging, 6 mM NMI-glutamate, 720 nm laser at 10 mW, 40 pulses, 2 Hz) induced only short-term but not long-term spine enlargement. Yellow, low-concentration strong stimulation (LS-uncaging, 2 mM NMI-glutamate, 720 nm laser at 10 mW, 120 pulses, 2 Hz) induced long-term but not short-term spine enlargement. **(b-d)** Properties of individual mitoflashes remained unchanged before and after glutamate uncaging. Data correspond to the experiments reported in Figure 2e. **(b)** Time-to-peak; **(c)** Amplitude; **(d)** Duration, indexed by full duration at half-maximum.  $n = 21-56$  mitoflash events per bin. Error bars are SEM.



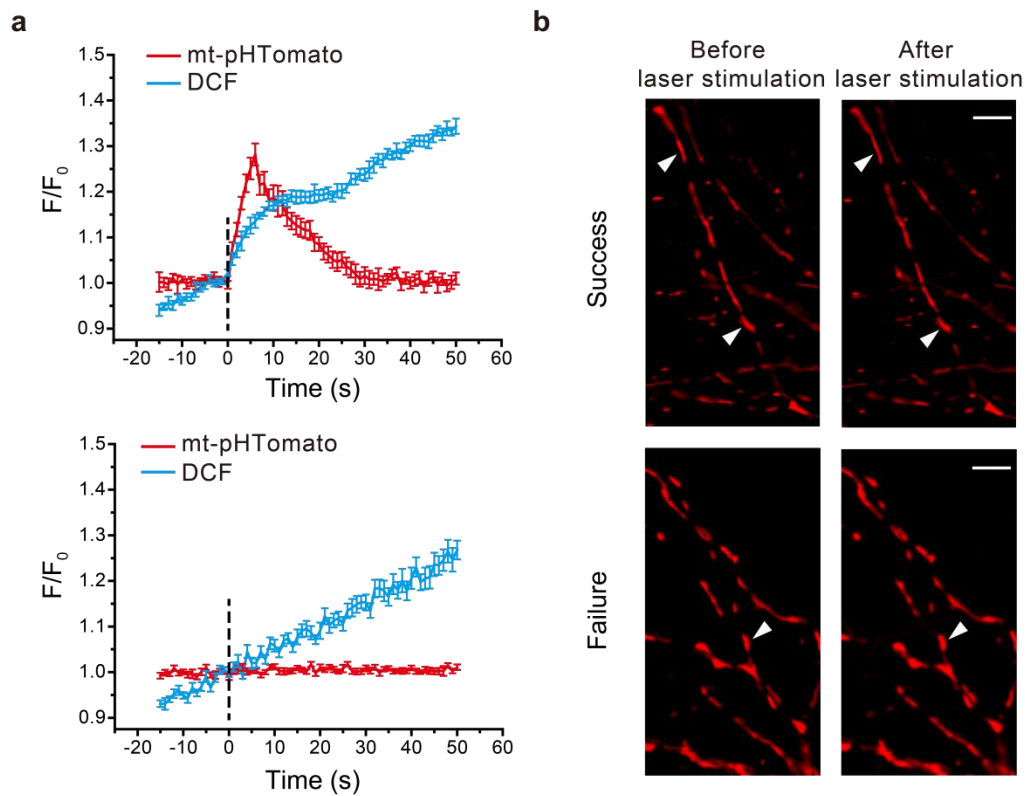

**Supplementary Figure 7 Laser stimulation *per se* does not increase local ROS or impair mitochondria during the photoactivation of mitoflash.**

(a) Local DCF signal change in response to laser stimulation with (upper panel) and without (lower panel) PA-mitoflashes (reported by mt-pHTomato) (mean $\pm$ s.e.m.). Note that the DCF signals associated with PA-mitoflashes are almost identical to those of spontaneous mitoflashes (Fig 5b). Note also the lack of any stepwise change in the DCF signal when same laser stimulation failed to activate a mitoflash. Vertical dashed line denotes the time of laser stimulation (720 nm, 10mW, 1ms). n= 54 successes and 59 failures. (b) Dendritic mitochondrial morphology (revealed by mt-pHTomato) before and after laser stimulation with and without mitoflash activation. White arrowheads mark target mitochondria. Scale bar, 5 $\mu$ m.

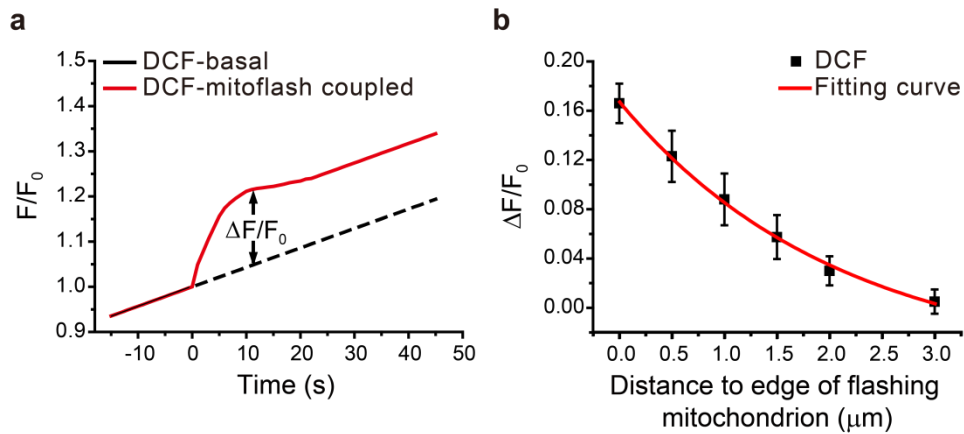

**Supplementary Figure 8 Cytosolic ROS signals from flashing mitochondria.**

(a) Schematic diagram showing DCF signals associated with mitoflashes, quantified as ( $\Delta F/F_0 = DCF_{coupled\ with\ mitoflash} - DCF_{baseline}$ ). (b) Amplitude of local DCF signal (peak  $\Delta F/F_0$ ) as a function of the distance from the near end of the corresponding mitoflash. A single-exponential fitting (smooth line) yielded a spatial decay constant of  $2.07\ \mu\text{m}$  (mean  $\pm$  s.e.m.) ( $r^2=0.99$ ).

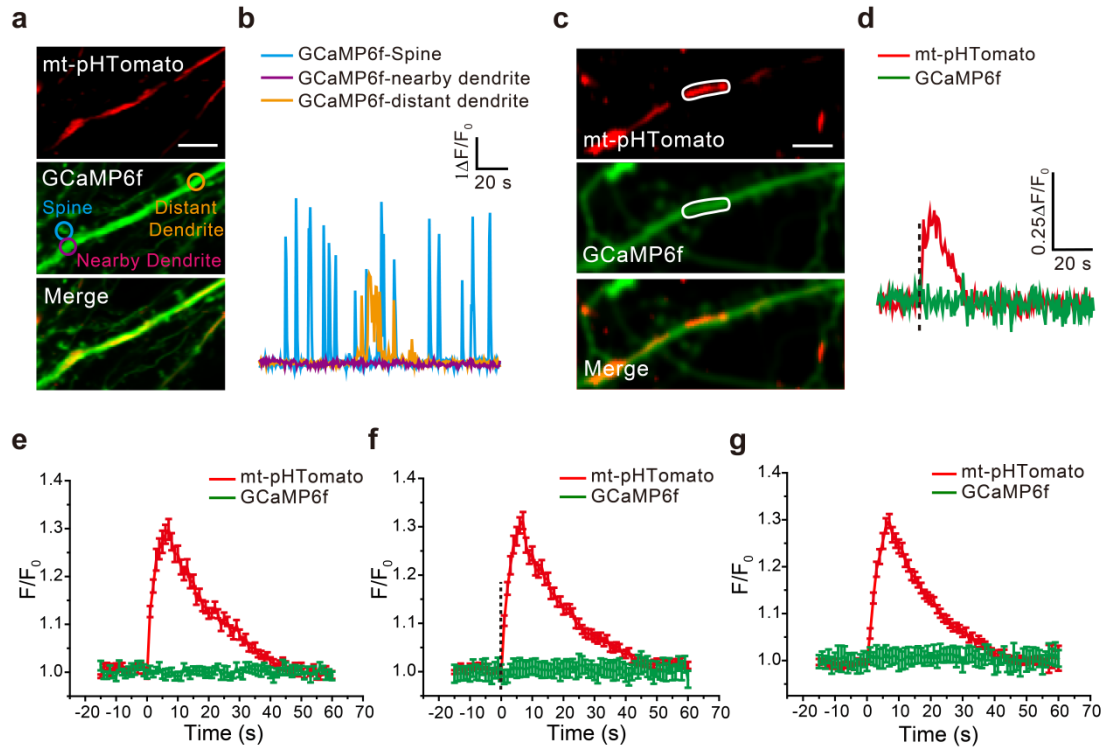

**Supplementary Figure 9 Lack of local cytosolic calcium change associated with dendritic mitoflashes.**

(a) Simultaneous imaging of dendritic mitoflashes (reported by mt-pHTomato) and cytosolic calcium (reported by GCaMP6f). Scale bar, 5 $\mu$ m. (b) Spontaneous spine and dendritic calcium transients reported by GCaMP6f. Traces were obtained from a single spine, its nearby dendritic area, and a distant dendritic area, as marked by circles in (a). (c, d) Representative example showing that a dendritic PA-mitoflash does not evoke any detectable change in local cytosolic calcium. White circles in (c) delimit a region of interest encompassing the target mitochondrion. Scale bar, 5 $\mu$ m. Dashed line in (d) indicates the time of laser stimulation. (e-g) Average time courses of local dendritic calcium changes during spontaneous (e), photo-activated (f), and nigericin-induced (g) mitoflashes (mean $\pm$ s.e.m.). n= 88, 76, and 131mitoflashes, respectively.

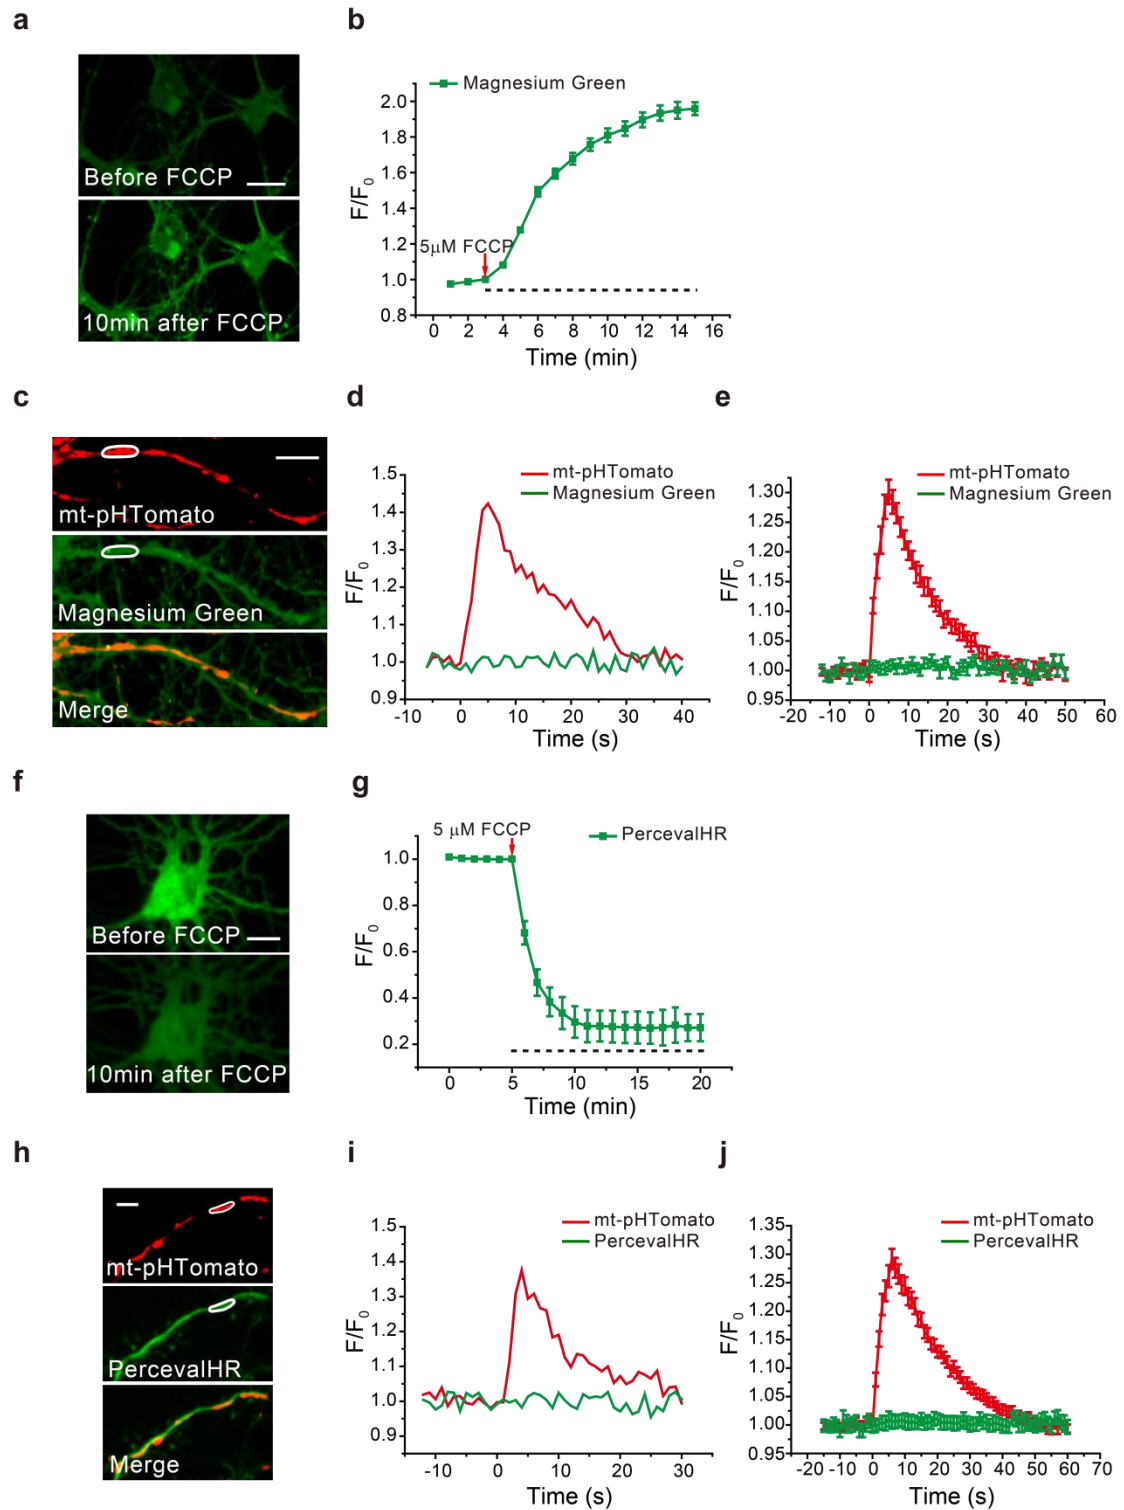

**Supplementary Figure 10 Spontaneous mitoflash is not accompanied by any changes in local cytosolic ATP concentration.**

(a) Representative images of magnesium green fluorescence in neurons before and after FCCP (5  $\mu$ M)-induced ATP depletion. Scale bar, 10  $\mu$ m. (b) Time course of magnesium green signal change during FCCP stimulation. An increase in magnesium

green fluorescence reflects a decrease in ATP concentration, the latter gives rise to an increase in free magnesium concentration (mean $\pm$ s.e.m.). n=33 neurons from 2 batches. **(c)** Representative images showing dendritic mitochondria and cytosolic magnesium green signal. Scale bar, 5  $\mu$ m. **(d)** Time courses of a spontaneous mitoflash reported by mt-pHTomato (circled in **c**) and its companion magnesium green signal. **(e)** Statistics. n=117 events in 24 neurons from 3 batches. **(f)** Representative images of percevalHR before and after FCCP (5  $\mu$ m) induced ATP depletion in neurons (mean $\pm$ s.e.m.). Scale bar, 10  $\mu$ m. **(g)** Time course of percevalHR signal change during FCCP stimulation. Decrease of percevalHR signal (488nm excitation) indicates decrease of cytosolic ATP concentration (mean $\pm$ s.e.m.). n=9 neurons from 3 batches. **(h)** Representative images of dendritic mitochondria and percevalHR signal. Scale bar, 5  $\mu$ m. **(i)** Time courses of a mt-pHTomato detected mitoflash (circled in **h**) and accompanying cytosolic percevalHR signal. **(j)** Statistics (mean $\pm$ s.e.m.). n=84 mitoflashes in 12 neurons from 3 batches.

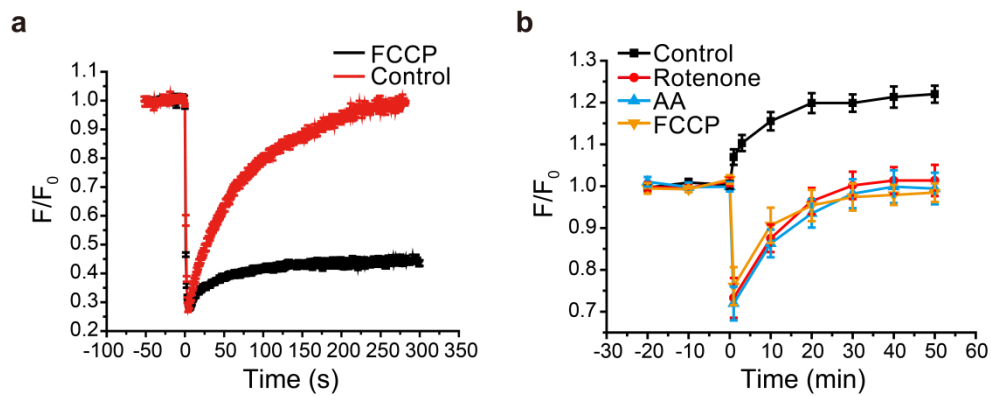

**Supplementary Figure 11 ETC inhibitors and the oxidative phosphorylation uncoupler disrupt spine actin dynamics and abolish spine sLTP.**

(a) Fluorescence recovery of actin-mcherry after photobleaching (FRAP) shows spine actin dynamics with and without FCCP treatment (20min, 300nM) (mean  $\pm$  s.e.m.). (b) Time-dependent spine morphology changes in response to LS glutamate uncaging stimulation with and without ETC and oxidative phosphorylation inhibitors (mean  $\pm$  s.e.m.).

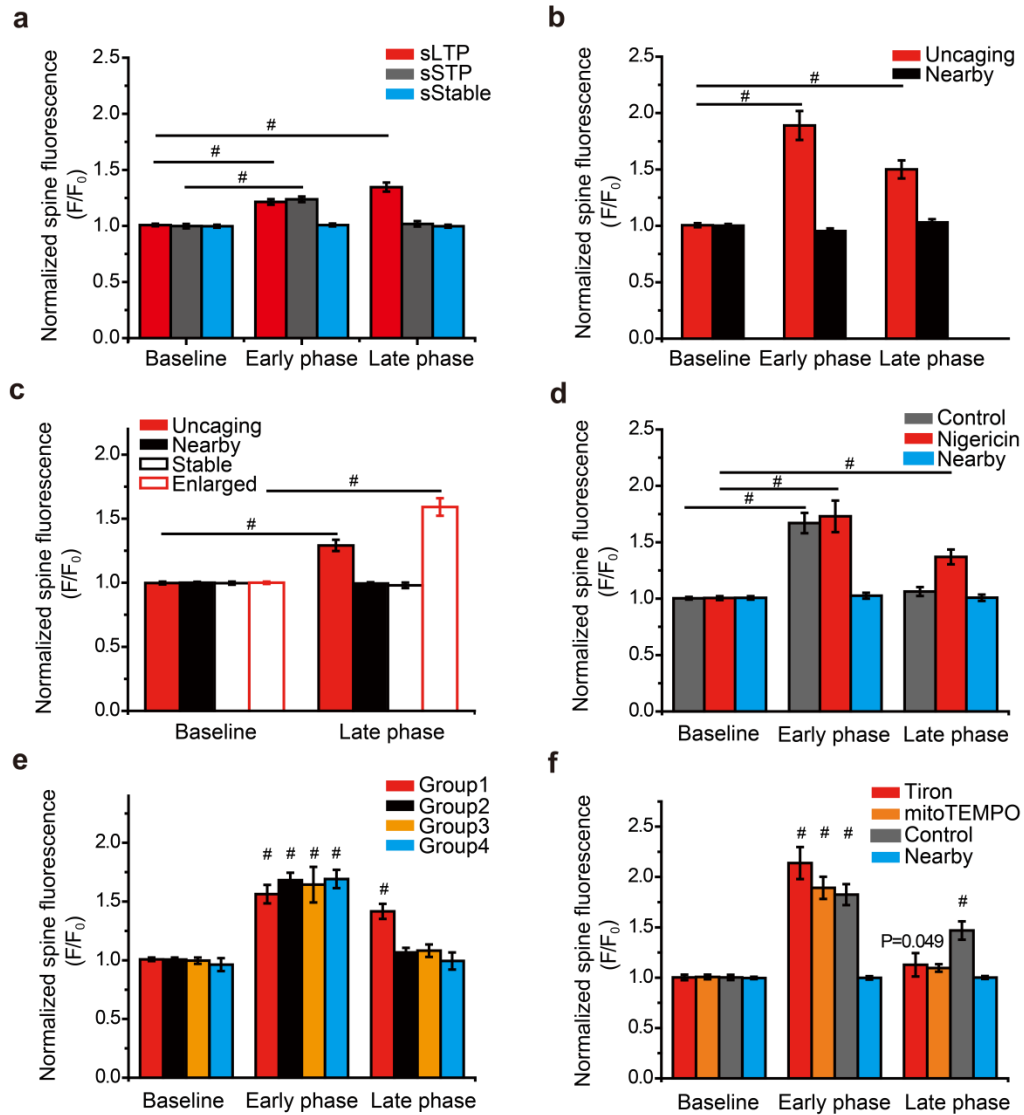

**Supplementary Figure 12 Statistics of spine size changes as in Figures 1, 2, 4, 5.**

(a) Size changes after HFS as in (Figure 1h). The baseline is the averaged normalized spine fluorescence before HFS. The early phase is the averaged spine fluorescence (normalized) at 1 min and 3 min. The late phase is the averaged spine fluorescence (normalized) 30 min after HFS.  $n = 8$  neurons from 4 batches. (b) Size changes after HS-glutamate uncaging as in (Figure 2d). The baseline is the averaged normalized spine fluorescence before HS-glutamate uncaging. The early phase is the averaged spine fluorescence (normalized) at 1 min and 3 min. The late phase is the averaged spine fluorescence (normalized) 30 min after glutamate uncaging. (c) Long-term size changes after LS-glutamate uncaging as in (Figure 2g). (d) Size changes after HW-glutamate uncaging as in (Figure 4b). (e) Size changes after HW-glutamate uncaging as in (Figure 4f). (f) Size changes after HS-glutamate uncaging as in (Figure 5d). Error bars are SEM; # $P < 0.001$  (paired sample t-test, early/late phase vs baseline).

## Supplementary Table

**Supplementary Table 1 Parameters of dendritic mitoflashes under different conditions.**

| <b>Mitoflash genesis</b> | <b>Time to peak</b> | <b><math>\Delta F/F_0</math></b> | <b>FDHM</b>    |
|--------------------------|---------------------|----------------------------------|----------------|
| Spontaneous              | 7.61 ± 0.45 s       | 0.47 ± 0.02                      | 12.96 ± 0.57 s |
| Photoactivated           | 6.78 ± 0.27 s       | 0.49 ± 0.02                      | 12.89 ± 0.47 s |
| Nigericin-induced        | 6.85 ± 0.20 s       | 0.48 ± 0.01                      | 13.02 ± 0.34 s |

Data are mean ± s.e.m.; 500–900 mitoflash events were analyzed for each condition.  
FDHM: full duration at half maximum.
